# Supplementary material for: New learning while consolidating memory during sleep is actively blocked by a protein synthesis dependent process
Source: eLife. 2016 Dec 6;5:e17769. doi: 10.7554/eLife.17769 (PMC5140267; doi:10.7554/eLife.17769)
Supplement: Figure 1—source data 1. — DOI: http://dx.doi.org/10.7554/eLife.17769.004 [file elife-17769-fig1-data1.xlsx]

## Sheet: Sheet1
	A1) ASW 12 h after train					A2) aniso 12 h after training						B1) Night Train 24 hr test					B2) Day Train 36 h test						C1)ASW+3min train 12 h after training						C2) Aniso+3min train 12 h after training
	Train	24 hr test		% decrease		Train	Test		% decrease			Train	Test		% decrease		Train	Test		% decrease			Train	Test		% decrease			Train	Test		% decrease
1	15.35	8.58333		-44.0825	1	8.16667	9.96667		22.0408			17.3167	20.7333		19.7305		12.35	6.7		-45.749			12.4333	5.4		-56.5684		1	5.86667	2.06667		-64.7727
2	8	13.8		72.5	2	9.11667	2.65		-70.9324			10.3	7.03333		-31.7152		11.9667	5.65		-52.7855			6.16667	4.46667		-27.5676		2	13.8667	4.45		-67.9087
3	14.5833	13.2333		-9.25714	3	14.8667	17.5333		17.9372			17.8667	22.9833		28.6381		5.56667	1.66667		-70.0599			15.8667	10.2333		-35.5042		3	4.76667	2.98333		-37.4126
4	11.7167	6.73333		-42.532	4	5.33333	6.21667		16.5625			6.05	9.26667		53.168		11.2667	11.9333		5.91716			8.85	4.61667		-47.8343		4	8.96667	3.73333		-58.3643
5	8.9	2.96667		-66.6667	5	6.4	6.68333		4.42708			11.1833	11.1		-0.745156		13.25	13.8833		4.77987			10.3833	4.91667		-52.6485		5	8.35	2.4		-71.2575
6	29.65	4.6		-84.4857	6	5.66667	5.88333		3.82353								7.11667	4.28333		-39.8126			12.6833	8.51667		-32.8515		6	10.15	1.98333		-80.4598
7	15.0833	3.05		-79.779	7	12.8167	12.3		-4.03121								11.6333	7.38333		-36.533			9.96667	7.78333		-21.9064
8	14.2667	4.5		-68.4579	8	14.9833	9.75		-34.9277								17.1333	6.53333		-61.8677
9	9.51667	0.366667		-96.1471	9	6.48333	7.78333		20.0514								21.6333	5.05		-76.6564					o
					10	15.0833	13.0667		-13.3702								14.2667	16.6167		16.472
					11	13.7333	13.05		-4.97573								12.7	2.63333		-79.2651
					12	22.3	11.1667		-49.9253
mean	14.1185	6.42593		-46.5453		11.2458	9.67083		-7.77665		mean	12.5433	14.2233		13.8152		12.6258	7.48485		-39.5964			10.9071	6.5619		-39.2687		mean	8.66111	2.93611		-63.3626
sd	6.47618	4.64473		51.8094		5.21291	4.06839		29.7811		sd	5.0042	7.16131		31.9702		4.33665	4.71789		34.3172			3.10762	2.27388		13.1997		sd	3.23976	0.988007		14.6675
se	2.15873	1.54824		17.2698		1.50484	1.17444		8.59707		se	2.23795	3.20264		14.2975		1.30755	1.4225		10.347			1.17457	0.859446		4.989		se	1.32263	0.403352		5.988
	p=	0.0247499				p=	0.205855					p=	0.324315				p=	0.0127624					p=	0.000945146					p=	0.00405884
	df=	8				df=	11					df=	4				df=	10					df=	6					df=	5
	t=	2.75803				t=	1.3445					t=	1.12291				t=	3.02608					t=	6.02326					t=	5.01314
