# Supplementary material for: New learning while consolidating memory during sleep is actively blocked by a protein synthesis dependent process
Source: eLife. 2016 Dec 6;5:e17769. doi: 10.7554/eLife.17769 (PMC5140267; doi:10.7554/eLife.17769)
Supplement: Figure 2—source data 1. — DOI: http://dx.doi.org/10.7554/eLife.17769.006 [file elife-17769-fig2-data1.xlsx]

## Sheet: Sheet1
	2A) Train and 24 h test during active phase					B)24h after 3 min train Night+aniso			C)24 h after 3 min train Night+ASW			D)12 h after 3 min train Night+Aniso			E)12 h after 3 min train Night+ASW
	Train	Test			1	4.13333		1	5.58333		1	14		1	4.73333					12.9167	4.65	4.13333	5.58333	14	4.73333		Anova: Single Factor
1	12.9167	4.65			2	1.43333		2	12.7167		2	3.35		2	3.6					5.06667	0.0833333	1.43333	12.7167	3.35	3.6
2	5.06667	0.0833333			3	13.2		3	10.25		3	2.18333		3	4.2					13.7667	4.9	13.2	10.25	2.18333	4.2		SUMMARY
3	13.7667	4.9			4	4.46667		4	5.16667		4	5.16667		4	6.15					13.1167	3.66667	4.46667	5.16667	5.16667	6.15		Groups	Count	Sum	Average	Variance
4	13.1167	3.66667			5	9.8		5	17.2333		5	9.21667		5	12.3833					18.6333	8.8	9.8	17.2333	9.21667	12.3833		Column 1	10	127.867	12.7867	18.4383
5	18.6333	8.8			6	2.43333		6	15.35		6	3.35		6	17					12.5333	8.35	2.43333	15.35	3.35	17		Column 2	8	41.6833	5.21042	7.74571
6	12.5333	8.35			7	7.51667		7	12.7667		7	4.18333		7	18					15.6167	6.63333	7.51667	12.7667	4.18333	18		Column 3	15	82.4	5.49333	10.2994
7	15.6167	6.63333			8	0					8	0.2		8	15.55					5.68333	4.6	0		0.2	15.55		Column 4	7	79.0667	11.2952	21.1942
8	5.68333	4.6			9	4.58333					9	5.61667		9	15.6167					14.9167		4.58333		5.61667	15.6167		Column 5	9	47.2667	5.25185	16.9629
9	14.9167				10	5.23333								10	7.03333					15.6167		5.23333			7.03333		Column 6	11	117.317	10.6652	31.1427
10	15.6167				11	6.51667								11	13.05							6.51667			13.05
					12	5.36667																5.36667
					13	6.61667																6.61667					ANOVA
					14	5.51667																5.51667					Source of Variation	SS	df	MS	F	P-value	F crit
					15	5.58333																5.58333					Between Groups	603.685	5	120.737	6.94593	4.51017e-05	2.38607
																											Within Groups	938.651	54	17.3824
mean	12.7867	5.21042				5.49333			11.2952			5.25185			10.6652
sd	4.29398	2.78311				3.20926			4.60372			4.1186			5.58056												Total	1542.34	59
se	1.35788	0.983978				1.01486			1.74004			1.37287			1.6826
	percent of control
	train	test
1		-64			1	-67.6747		1	-56.3347		1	9.48905		1	-62.9823
2		-98.3553			2	-88.7904		2	-0.547445		2	-73.8008		2	-71.8457
3		-64.4068			3	3.23253		3	-19.8384		3	-82.9249		3	-67.1533
4		-72.0457			4	-65.0678		4	-59.5933		4	-59.5933		4	-51.903
5		-52.7728			5	-23.3577		5	34.7758		5	-27.9197		5	-3.15433
6		-33.3777			6	-80.9698		6	20.0469		6	-73.8008		6	32.951
7		-57.524			7	-41.2148		7	-0.156413		7	-67.2836		7	40.7716
8		-19.0616			8	-100					8	-98.4359		8	21.6111
9					9	-64.1554					9	-56.074		9	22.1324
10					10	-59.0719								10	-44.9948
					11	-49.0355								11	2.05944
					12	-58.0292
					13	-48.2534
					14	-56.8561
					15	-56.3347
mean		-57.693				-57.0386			-11.6639			-58.9271			-16.5916
sd		24.0598				25.0985			36.0041			32.2101			43.6436
se		8.50644				6.4804			13.6083			10.7367			13.159
