# Supplementary material for: New learning while consolidating memory during sleep is actively blocked by a protein synthesis dependent process
Source: eLife. 2016 Dec 6;5:e17769. doi: 10.7554/eLife.17769 (PMC5140267; doi:10.7554/eLife.17769)
Supplement: Figure 3—source data 1. — DOI: http://dx.doi.org/10.7554/eLife.17769.008 [file elife-17769-fig3-data1.xlsx]

## Sheet: Sheet1
	Fig. 3A-Full night training 10 min after 10 micoM aniso						Fig. 3B-Full night training 10 min after ASW\					Fig. 3C-24 h test after anisomycin alone at night
	Train	24 h test		% decrease			Train	24 h test		% decrease		Naïve(day)	24 h test		% decrease
1	9.98333	5.83333		-41.5693			17.3167	20.7333		19.7305		12.35	14.85		17.6167
2	6.63333	6.1		-8.0402			10.3	7.03333		-31.7152		11.9667	11.8333		-6.27625
3	12.3833	5.93333		-52.0861			17.8667	22.9833		28.6381		5.56667	11.9667		-5.22021
4	20.15	2.43333		-87.9239			6.05	9.26667		53.168		11.2667	16.45		30.2892
5	18.0667	14.0833		-22.048			11.1833	11.1		-0.745156		13.25	10.95		-13.2725
6	12.4833	4.06667		-67.4232								7.11667	16.35		29.4972
7	8.35	9.13333		9.38124								11.6333	10.3		-18.4207
8												17.1333
9												21.6333
10												14.2667
11												12.7
mean	12.5786	6.79762		-38.5299		mean	12.5433	14.2233		13.8152		12.6258	13.2429		4.88762
sd	4.9574	3.81239		34.0694		sd	5.0042	7.16131		31.9702		4.33665	2.5838		20.4645
se	1.87372	1.44095		12.877		se	2.23795	3.20264		14.2975		1.30755	0.976583		7.73485
	p=	0.0471583					p=	0.324315				p=	0.739743
	df=	6					df=	4				df=	16
	t=	2.49006					t=	1.12291				t=	0.338019
