# Supplementary material for: New learning while consolidating memory during sleep is actively blocked by a protein synthesis dependent process
Source: eLife. 2016 Dec 6;5:e17769. doi: 10.7554/eLife.17769 (PMC5140267; doi:10.7554/eLife.17769)
Supplement: Figure 4—source data 1. — DOI: http://dx.doi.org/10.7554/eLife.17769.010 [file elife-17769-fig4-data1.xlsx]

## Sheet: Sheet1
		4A) Train 1h after 10 µM aniso						4B) Train 2h after 10 µM aniso						4C) Train 2.5h after 30 µM aniso					4D) Train 2.5h after 10 µM aniso						4E) Train 10 min after 3.3 µM aniso
		Train	24 h Test		% decrease			Train	24 h Test		% decrease			Train	24 h Test		% decrease		Train	24 h Test		% decrease			Train	24 h Test		% decrease		Train	24 h Test		% decrease
		14.1333	11.75		-16.8632			9.88333	5.53333		-44.0135			7.51667	8.05		7.09534		8.41667	3.68333		-56.2376			10.3167	2.16667		-78.9984
		13.5167	14.4		6.53514			10.0833	6.9		-31.5702			8.1	8.05		-0.617284		13.0667	4.7		-64.0306			11.95	3.38333		-71.6876
		13.3667	14.2167		6.3591			13.9833	4.35		-68.8915			13	10.9833		-15.5128		7.18333	1.86667		-74.0139			13.7167	17.4167		26.9745
		9.98333	11.85		18.6978			13.5667	5.2		-61.6708			6.28333	8.83333		40.5836								15.15	3.08333		-79.648
		15.5833	11.7167		-24.8128			15.2833	4.66667		-69.4656			8.03333	5.05		-37.1369								11.45	6.05		-47.1616
								21.15	5.41667		-74.3893			15.1833	11.2667		-25.7958								11.5167	4.35		-62.2287
																									15.8333	6.88333		-56.5263
	mean	13.3167	12.7867		-2.01679		mean	13.9917	5.34444		-58.3335			9.68611	8.70556		-5.23066		9.55556	3.41667		-64.7607			12.8476	6.19048		-52.7537
	sd	2.05902	1.39146		18.114		sd	4.12903	0.886546		16.8858			3.54215	2.27976		27.6363		3.10261	1.43537		8.91061			2.07794	5.22239		37.1089
	se	0.920824	0.622281		8.10081		se	1.68567	0.361931		6.89361			1.44608	0.930707		11.2825		1.79129	0.828709		5.14454			0.785386	1.97388		14.0259
		p=	0.655202					p=	0.00555034					p=	0.366868				p=	0.0320649					p=	0.012391
		df=	4					df=	5					df=	5				df=	2					df=	6
		t=	0.481678					t=	4.65634					t=	0.991726				t=	5.4493					t=	3.52845
