# Supplementary material for: New learning while consolidating memory during sleep is actively blocked by a protein synthesis dependent process
Source: eLife. 2016 Dec 6;5:e17769. doi: 10.7554/eLife.17769 (PMC5140267; doi:10.7554/eLife.17769)
Supplement: Figure 5—source data 1. — DOI: http://dx.doi.org/10.7554/eLife.17769.012 [file elife-17769-fig5-data1.xlsx]

## Sheet: Sheet1
			5A) aniso 2 h before 3min train+aniso				5b) aniso 0.5 h before 3min train+aniso				5c) 3 min train + aniso				5d) naïve
		1	15.3				5				7.48333				14.8167		15.3	5	7.48333	14.8167		Anova: Single Factor
		2	5.83333				4.68333				4.48333				12.9333		5.83333	4.68333	4.48333	12.9333
		3	20.0167				6.03333				9.7				13.05		20.0167	6.03333	9.7	13.05		SUMMARY
		4	19.15				18.85				9.55				11.9167		19.15	18.85	9.55	11.9167		Groups	Count	Sum	Average	Variance
		5	23.35				11.0333				9.26667				16.6		23.35	11.0333	9.26667	16.6		Column 1	8	133.1	16.6375	46.2616
		6	23				15.7167				15.4				12		23	15.7167	15.4	12		Column 2	8	73.7667	9.22083	29.6068
		7	19.5				7.35				6.8						19.5	7.35	6.8			Column 3	15	116.4	7.76	23.9427
		8	6.95				5.1				5.1						6.95	5.1	5.1
		9									18.1								18.1
		10									5.76667								5.76667			ANOVA
		11									3								3			Source of Variation	SS	df	MS	F	P-value	F crit
		12									13.1667								13.1667			Between Groups	426.894	2	213.447	6.8991	0.00366443	3.34039
		13									1.61667								1.61667			Within Groups	866.276	28	30.9384
		14									1.06667								1.06667
		15									5.9								5.9			Total	1293.17	30
		mean	16.6375				9.22083				7.76				13.5528
		sd	6.80159				5.44121				4.89312				1.8225
		se	2.40472				1.92376				1.2634				0.744031
		p=	0.00160673			p=	0.518609
		df=	21			df=	21
		t=	3.61972			t=	0.656537
		correction:	0.00321346
