# Supplementary material for: New learning while consolidating memory during sleep is actively blocked by a protein synthesis dependent process
Source: eLife. 2016 Dec 6;5:e17769. doi: 10.7554/eLife.17769 (PMC5140267; doi:10.7554/eLife.17769)
Supplement: Figure 6—source data 1. — DOI: http://dx.doi.org/10.7554/eLife.17769.014 [file elife-17769-fig6-data1.xlsx]

## Sheet: Sheet1
6A1) Ethanol 24 h before training				6A2) Ethanol, DRB 24 h before training					6B1) 10 micoM aniso, DRB, no training		6B2) 10 µM aniso, ethanol, 3 min train		6B3) 10 µM aniso, DRB, 3 min train				Anova
	train	test		train	test				13.1667		4.46667		17.1167					DRB	ethanol	naïve
1	20	5.85		16.7333	8.15				13.15		3.46667		11.7667				1	17.1167	4.46667	13.1667
2	16.1167	0		24.3667	9.71667				4.7		12.75		3.01667				2	11.7667	3.46667	13.15
3	27.8833	8.16667		33.8667	2.25				16.15		0.75		11.2167				3	3.01667	12.75	4.7
4				21.7	6.15				13.8167		9.05		22.1333				4	11.2167	0.75	16.15
									11.0333		11.0167		10.1333				5	22.1333	9.05	13.8167
mean	21.3333	4.67222		24.1667	6.56667						7.38333		16.0333				6	10.1333	11.0167	11.0333
sd	5.99558	4.2088		7.19882	3.2268								21.25				7	16.0333	7.38333
se	3.46155	2.42995		3.59941	1.6134												8	21.25
								mean	12.0028		6.98333		14.0833
	p=	0.00943428		p=	0.0373915			sd	3.93525		4.311		6.33387					Anova: Single Factor
	t=	10.2225		t=	3.57603			se	1.60656		1.6294		2.23936
	df=	2		df=	3													SUMMARY
												t-test, 6B2 vs 6B3						Groups	Count	Sum	Average	Variance
												p=	0.0267304					Column 1	8	112.667	14.0833	40.1179
												df=	13					Column 2	7	48.8833	6.98333	18.5847
												t=	2.49718					Column 3	6	72.0167	12.0028	15.4862
												t-test, 6B1 vs 6B3
												p=	0.494228					ANOVA
												df=	12					Source of Variation	SS	df	MS	F	P-value	F crit
												t=	0.705066					Between Groups	194.711	2	97.3553	3.73037	0.0441178	3.55456
																		Within Groups	469.765	18	26.098
																		Total	664.475	20
