# Supplementary material for: New learning while consolidating memory during sleep is actively blocked by a protein synthesis dependent process
Source: eLife. 2016 Dec 6;5:e17769. doi: 10.7554/eLife.17769 (PMC5140267; doi:10.7554/eLife.17769)
Supplement: Figure 7—source data 1. — DOI: http://dx.doi.org/10.7554/eLife.17769.016 [file elife-17769-fig7-data1.xlsx]

## Sheet: Sheet1
	7A) 24 memory after 3 min train (inactive phase) + anisomycin at different concentrations										7B) C/EBP expression	Active phase								Inactive phase
		10 µM	30 µM	3.3 µM								These 2 groups were run together, and the ASW is a control for the other group								These 3 groups were run together, and the ASW is a control for the other 2 groups
	1	5.63333	13.2667	12.8667								ASW (not shown)		10 µM						ASW (not shown)		10 µM	3.3 µM
	2	5	14.5667	13.0833							1	44.2281		14090.3					1	16.5522		7141.01	3368.93
	3	11.3333	17.0667	15.6							2	66.6512		13944					2	52.6454		10302.8	3607.79
	4	7.53333	14.6333	16.4667							3	166.924		21044.9					3	344.931		24047.8	15353.8
	5	6.58333	15.5833	15.7833							4	173.317		21268.3					4	41.0657		9696.91	6285.47
	6		12.6167	14.3167							5	87.1408		16287.2					5	44.806		23228.6	10712
	7			13.3833							6	61.738							6			2423.23	14558.5
	mean	7.21667	14.6222	14.5							mean	100		17327						100		12806.7	8981.08
	sd	2.49344	1.59763	1.45373							sd	56.047		3617.99						137.583		8841.2	5335.73
	se	1.1151	0.652228	0.549459							se	22.8811		1618.01						61.5291		3609.4	2178.3
	p=	0.000207289		7.64328e-05								(C/EBP)/GAPDH value for each sample was normalized to the mean of the control
	df=	9		10
	t=	5.98096		6.41911													10 µM	10 µM	3.3 µM
																	14090.3	7141.01	3368.93
	correction:	0.000414578		0.000152866													13944	10302.8	3607.79
																	21044.9	24047.8	15353.8
																	21268.3	9696.91	6285.47
																	16287.2	23228.6	10712
																		2423.23	14558.5
																	Anova: Single Factor
																	SUMMARY
																	Groups	Count	Sum	Average	Variance
																	10 µM	5	86634.8	17327	1.30898e+07
																	10 µM	6	76840.3	12806.7	7.81668e+07
																	3.3 µM	6	53886.5	8981.08	2.84701e+07
																	ANOVA
																	Source of Variation	SS	df	MS	F	P-value	F crit
																	Between Groups	1.89968e+08	2	9.49841e+07	2.27101	0.139893	3.73889
																	Within Groups	5.85543e+08	14	4.18245e+07
																	Total	7.75512e+08	16
