# Supplementary material for: New learning while consolidating memory during sleep is actively blocked by a protein synthesis dependent process
Source: eLife. 2016 Dec 6;5:e17769. doi: 10.7554/eLife.17769 (PMC5140267; doi:10.7554/eLife.17769)
Supplement: Figure 8—source data 1. — DOI: http://dx.doi.org/10.7554/eLife.17769.018 [file elife-17769-fig8-data1.xlsx]

## Sheet: Sheet1
Figure 8A)										Figure 8B)
1-C/EBP after 3 min training with ASW vs naïve					2-C/EBP after 3 min training with Aniso vs naïve					Normalized buccal ganglia levels of apC/EBP to apH4 mRNA 15 min after LFI training.
	3 min train	naïve			3 min train	naïve				Kept isolated					With conspecifics
1	131.54	51.3004			22648.6	31566.9				8B1) Training in isolation		Naïve in isolation			8B2)Trained		Naïve
2	269.941	27.8089			38254.9	15896.8			1	511.455		68.4092		1	1579.36		320.312
3	1185.28	54.8719			46325.5	20997.6			2	622.222		32.745		2	591.326		175.408
4	786.948	98.9811			38929.8	17326.4			3	1469.54		97.9004		3	934.847		194.898
5	210.291	23.1553			25460.7	15784.3			4	608.494		227.544		4	1016.65		82.8921
6	1367.97	35.1936			48677.5	11799.2			5	2227.96		178.47		5	1473.58		251.726
7	1028.35	264.323			26626.9	7248.84			6	1233.28		118.035		6	390.447		125.346
8	336.339	147.062			12436.2	9432.93			7	2783.16		73.1199
9		197.304							8	712.847		68.4558
									9	288.209		89.2678
mean	664.581	100			32420	16256.6			10	1880.61		46.0532
sd	488.024	85.4479			12597.7	7615.3
se	172.542	28.4826			4453.97	2692.42			mean	1233.78		100			997.701		191.764		(data expressed as a percentage of mean naïve in isolation)
									sd	837.667		60.5704			469.68		85.6292
p=	0.00375468			p=	0.007745				se	264.894		19.154			191.746		34.958
df=	15			df=	14														Naïve - isolated vs conspecifics
t=	3.42567			t=	3.10565					p=	0.000461797				p=	0.00202797			p=	0.0245575
										df=	18				df=	10			df=	14
										t=	4.26898				t=	4.13499			t=	2.5188
(C/EBP)/GAPDH value for each was normalized to the mean of the naïve with ASW
										correction:	0.000923594					0.00405594				0.0491151
