# Supplementary material for: New learning while consolidating memory during sleep is actively blocked by a protein synthesis dependent process
Source: eLife. 2016 Dec 6;5:e17769. doi: 10.7554/eLife.17769 (PMC5140267; doi:10.7554/eLife.17769)
Supplement: Figure 9—source data 1. — DOI: http://dx.doi.org/10.7554/eLife.17769.020 [file elife-17769-fig9-data1.xlsx]

## Sheet: Sheet1
	9A													9B) CREB-1 expression after 3 min train with aniso sleep phase							9B) CREB-2 expression after 3 min train with aniso sleep phase
	1) CREB-1				2) CREB-2									1) ASW			2) Anisomycin				1) ASW			2) Anisomycin
	3.3 µM	10 µM	ASW (not shown)		3.3 µM	10 µM	ASW (not shown)							Trained	naïve		Trained	naïve			Trained	naïve		Trained	naïve
1	69.066	62.4553	74.5897		116.306	137.44	59.9615						1	180.96	4.05805		297.732	73.7237			194.42	24.4681		43.7016	84.6737
2	92.371	353.343	90.3179		146.891	410.273	121.72						2	31.4123	11.2818		121.502	93.9587			109.431	38.9418		47.7078	83.1351
3	249.624	591.796	160.507		270.89	647.128	185.981						3	99.907	279.926		170.396	122.127			148.114	123.138		85.9777	60.163
4	168.69	382.865	128.775		248.554	559.474	99.2878						4	209.342	99.0003		263.656	161.891			81.1389	161.181		168.845	160.973
5	249.73	402.304	125.425		414.557	546.26	115.169						5	73.6622	57.3222		255.311	63.4213			123.479	121.004		207.323	130.396
6	341.973	729.601	20.3855			73.2565	17.8807						6	103.107	73.6553		255.143	182.894			150.215	150.994		139.942	58.8452
7		33.6083				35.3883							7	96.1338	211.93		155.838	59.6359			63.3575	183.771		139.942	121.814
8		47.3283											8	16.2051	130.263		102.642	42.3481			15.2767	65.8608
															32.5627							30.6415
mean	195.242	325.413	100		239.439	344.174	100
sd	104.56	260.754	49.4235		117.756	256.524	57.3441						mean	101.341	100		202.778	100			110.679	100		119.063	100
se	42.6865	92.1905	20.1771		52.6619	96.9569	23.4106						sd	66.483	93.5131		73.7846	51.0035			56.5129	60.9784		61.9214	38.5519
													se	23.5053	31.171		26.0868	18.0325			19.9803	20.3261		23.4041	14.5712
														p=	0.973596		p=	0.00591885			p=	0.714444		p=	0.502441
Anova: Single Factor								Anova: Single Factor						df=	15		df=	14			df=	15		df=	12
														t=	0.0336554		t=	3.2409			t=	0.372894		t=	0.69145
SUMMARY								SUMMARY
Groups	Count	Sum	Average	Variance				Groups	Count	Sum	Average	Variance
3.3 µM	6	1171.45	195.242	10932.8				3,3 µM	5	1197.2	239.439	13866.4
10 µM	8	2603.3	325.413	67992.7				10 µM	7	2409.22	344.174	65804.4
ASW (not shown)	6	600	100	2442.68				ASW (not shown)	6	600	100	3288.34
ANOVA								ANOVA
Source of Variation	SS	df	MS	F	P-value	F crit		Source of Variation	SS	df	MS	F	P-value	F crit
Between Groups	178940	2	89470.1	2.80199	0.0887658	3.59153		Between Groups	192851	2	96425.3	3.09894	0.0747294	3.68232
Within Groups	542827	17	31931					Within Groups	466734	15	31115.6
Total	721767	19						Total	659584	17
